# Supplementary material for: Metabolic Profiling Reveals Distinct Variations Linked to Nicotine Consumption in Humans — First Results from the KORA Study
Source: PLoS One. 2008 Dec 5;3(12):e3863. doi: 10.1371/journal.pone.0003863 (PMC2588343; doi:10.1371/journal.pone.0003863)
Supplement: Table S1 — The abbreviation, class and biochemical name of each metabolite. For each metabolite, the abbreviation, class and biochemical name is listed in the first to third columns, respectively. (0.05 MB XLS) [file pone.0003863.s001.xls]

## Sheet: Table_S1
Metabolite	class	Biochemical Name
C0	ac.carnitines	DL-Carnitine
C10	ac.carnitines	Decanoyl-L-carnitine
C10:1	ac.carnitines	Decenoyl-L-carnitine
C11	ac.carnitines	Decadienyl-L-carnitine
C12	ac.carnitines	Dodecanoyl-L-carnitine
C12:1	ac.carnitines	Dodecenoyl-L-carnitine
C14	ac.carnitines	Tetradecanoyl-L-carnitine
C14:1	ac.carnitines	Tetradecenoyl-L-carnitine
C14:2	ac.carnitines	Tetradecadienyl-L-carnitine
C16	ac.carnitines	Hexadecanoyl-L-carnitine
C16:1	ac.carnitines	Hexadecenoyl-L-carnitine
C18	ac.carnitines	Octadecanoyl-L-carnitine
C18:1	ac.carnitines	Octadecenoyl-L-carnitine
C18:2	ac.carnitines	Octadecadienyl-L-carnitine
C18:2-OH	ac.carnitines	Hydroxyoctadecenoyl-L-carnitine
C2	ac.carnitines	Acetly-L-carnitine
C3	ac.carnitines	Propionyl-L-carnitine
C3-DC	ac.carnitines	Malonyl-L-carnitine
C3-DC-M	ac.carnitines	Methylmalonyl-L-carnitine
C4	ac.carnitines	Butyryl-L-carnitine
C4:1-DC	ac.carnitines	Fumaryl-L-carnitine
C5	ac.carnitines	Valeryl-L-carnitine
C5:1-DC	ac.carnitines	Glutaconyl-L-carnitine
C5-DC	ac.carnitines	Glutary-L-carnitine
C5-M-DC	ac.carnitines	Methylglutary-L-carnitine
C6	ac.carnitines	Hexanoyl-L-carnitine
C8	ac.carnitines	Octanoyl-L-carnitine
C8:1	ac.carnitines	Octenoyl-L-carnitine
C9	ac.carnitines	Nonayl-L-carnitine
Ala	aminoacids	Alanine
Arg	aminoacids	Arginine
Asp	aminoacids	Aspartic acid
Cit	aminoacids	Citrullinemia
Glu	aminoacids	Glutamic acid
Gly	aminoacids	Glycine
His	aminoacids	Histidine
Lys	aminoacids	Lysine
Met	aminoacids	Methionine
Orn	aminoacids	Ornithine
Phe	aminoacids	Phenylalanine
Pro	aminoacids	Proline
Ser	aminoacids	Serine
Thr	aminoacids	Threonine
Trp	aminoacids	Tryptophan
Tyr	aminoacids	Tyrosine
Val	aminoacids	Valine
xLeu	aminoacids	xLeucine
HNAc-H2-dH	sugars	HNAc for N-acetylglucosamine
HNAc-H4	sugars	HNAc for N-acetylglucosamine
P	sugars	Pentose
UA	sugars	uronic acid
dH	sugars	desoxyhexose
H1	sugars	1-hexose
H2	sugars	2-hexose
H3-HNAc2-NANA	Prostaglandines	NANA for N-acetylneuraminicacid
HNAc	sugars	N-acetylglucosamine
12S-HETE	Prostaglandines	12S-HETE
DHA	Prostaglandines	Docosahexaenoic acid
AA	Prostaglandines	Arachidonic acid
Kynurenine	Biogenic Amines	Kynurenine
Spermidine	Biogenic Amines	Spermidine
Putrescine	Biogenic Amines	Putrescine
Met.Sulfoxide	Biogenic Amines	Met.Sulfoxide
Serotonin	Biogenic Amines	Serotonin
totalDMA	Biogenic Amines	Total DMA
SM (OH) C20:1	sphingolipids	Hydroxysphingomyeline C20:1
SM (OH) C22:1	sphingolipids	Hydroxysphingomyeline C22:1
SM (OH) C28:1	sphingolipids	Hydroxysphingomyeline C28:1
SM (OH) C22:2	sphingolipids	Hydroxysphingomyeline C22:2
SM (OH) C20:3	sphingolipids	Hydroxysphingomyeline C20:3
SM (OH,COOH) C16:0	sphingolipids	Hydroxyl-carboxysphingomyeline C16:0
SM (OH,COOH) C20:3	sphingolipids	Hydroxyl-carboxysphingomyeline C20:3
SM (OH,COOH) C20:4	sphingolipids	Hydroxyl-carboxysphingomyeline C20:4
SM C14:0	sphingolipids	Sphingomyeline C14:0
SM C16:0	sphingolipids	Sphingomyeline C16:0
SM C18:0	sphingolipids	Sphingomyeline C18:0
SM C16:1	sphingolipids	Sphingomyeline C16:1
SM C18:1	sphingolipids	Sphingomyeline C18:1
SM C20:1	sphingolipids	Sphingomyeline C20:1
SM C22:1	sphingolipids	Sphingomyeline C22:1
SM C20:2	sphingolipids	Sphingomyeline C20:2
SM C22:2	sphingolipids	Sphingomyeline C22:2
SM (OH,COOH) C22:0	sphingolipids	Hydroxyl-carboxysphingomyeline C22:0
SM (OH,COOH) C24:0	sphingolipids	Hydroxyl-carboxysphingomyeline C24:0
SM (OH,COOH) C16:1	sphingolipids	Hydroxyl-carboxysphingomyeline C16:1
SM (OH,COOH) C18:1	sphingolipids	Hydroxyl-carboxysphingomyeline C18:1
SM (OH,COOH) C24:1	sphingolipids	Hydroxyl-carboxysphingomyeline C24:1
SM (OH,COOH) C16:2	sphingolipids	Hydroxyl-carboxysphingomyeline C16:2
SM (OH,COOH) C18:2	sphingolipids	Hydroxyl-carboxysphingomyeline C18:2
SM (OH,COOH) C20:2	sphingolipids	Hydroxyl-carboxysphingomyeline C20:2
SM C20:3	sphingolipids	Sphingomyeline C20:3
SM C24:3	sphingolipids	Sphingomyeline C24:3
SM C26:3	sphingolipids	Sphingomyeline C26:3
SM C28:3	sphingolipids	Sphingomyeline C28:3
SM C22:4	sphingolipids	Sphingomyeline C22:4
SM C24:4	sphingolipids	Sphingomyeline C24:4
SM C26:4	sphingolipids	Sphingomyeline C26:4
SM C28:4	sphingolipids	Sphingomyeline C28:4
SM (OH) C20:0	sphingolipids	Hydroxysphingomyeline C20:0
SM (OH) C22:0	sphingolipids	Hydroxysphingomyeline C22:0
SM (OH) C26:0	sphingolipids	Hydroxysphingomyeline C26:0
SM (OH) C28:0	sphingolipids	Hydroxysphingomyeline C28:0
SM (COOH) C16:0	sphingolipids	Carboxysphingomyeline C16:0
SM (COOH) C18:0	sphingolipids	Carboxysphingomyeline C18:0
SM (COOH) C16:1	sphingolipids	Carboxysphingomyeline C16:1
SM (COOH) C18:1	sphingolipids	Carboxysphingomyeline C18:1
SM (COOH) C16:2	sphingolipids	Carboxysphingomyeline C16:2
SM (COOH) C18:2	sphingolipids	Carboxysphingomyeline C18:2
SM (COOH) C18:3	sphingolipids	Carboxysphingomyeline C18:3
PS aa (OH, COOH) C24:2	glycerophospholipids	Hydroxyl-carboxyphosphatidylserines diacyl C24:2
PE e (COOH) C12:1	glycerophospholipids	Carboxyphosphatidylethanolamines alkyl C12:1
PE e (COOH) C16:3	glycerophospholipids	Carboxyphosphatidylethanolamines alkyl C16:3
PC e C32:2	glycerophospholipids	Phosphatidylcholine alkyl C32:2
PC aa C32:0	glycerophospholipids	Phosphatidylcholine diacyl C32:0
PC aa C34:0	glycerophospholipids	Phosphatidylcholine diacyl C34:0
PC aa C36:0	glycerophospholipids	Phosphatidylcholine diacyl C36:0
PC aa C38:0	glycerophospholipids	Phosphatidylcholine diacyl C38:0
PC aa C32:1	glycerophospholipids	Phosphatidylcholine diacyl C32:1
PC aa C34:1	glycerophospholipids	Phosphatidylcholine diacyl C34:1
PC aa C36:1	glycerophospholipids	Phosphatidylcholine diacyl C36:1
PC aa C38:1	glycerophospholipids	Phosphatidylcholine diacyl C38:1
PE a (OH) C12:1	glycerophospholipids	Hydroxyphosphatidylethanolamines acyl C12:1
PC aa C32:2	glycerophospholipids	Phosphatidylcholine diacyl C32:2
PC aa C34:2	glycerophospholipids	Phosphatidylcholine diacyl C34:2
PC aa C36:2	glycerophospholipids	Phosphatidylcholine diacyl C36:2
PC aa C38:2	glycerophospholipids	Phosphatidylcholine diacyl C38:2
PC aa C34:3	glycerophospholipids	Phosphatidylcholine diacyl C34:3
PC aa C36:3	glycerophospholipids	Phosphatidylcholine diacyl C36:3
PC aa C38:3	glycerophospholipids	Phosphatidylcholine diacyl C38:3
PC aa C34:4	glycerophospholipids	Phosphatidylcholine diacyl C34:4
PC aa C36:4	glycerophospholipids	Phosphatidylcholine diacyl C36:4
PC aa C38:4	glycerophospholipids	Phosphatidylcholine diacyl C38:4
PC aa C40:4	glycerophospholipids	Phosphatidylcholine diacyl C40:4
PC aa C36:5	glycerophospholipids	Phosphatidylcholine diacyl C36:5
PC aa C38:5	glycerophospholipids	Phosphatidylcholine diacyl C38:5
PC aa C40:5	glycerophospholipids	Phosphatidylcholine diacyl C40:5
PC aa C38:6	glycerophospholipids	Phosphatidylcholine diacyl C38:6
PC aa C40:6	glycerophospholipids	Phosphatidylcholine diacyl C40:6
PC aa (OH, COOH) C30:3	glycerophospholipids	Hydroxyl-carboxyphosphatidylcholine diacyl C30:3
PC aa (OH, COOH) C28:4	glycerophospholipids	Hydroxyl-carboxyphosphatidylcholine diacyl C28:4
PC aa (OH, COOH) C30:4	glycerophospholipids	Hydroxyl-carboxyphosphatidylcholine diacyl C30:4
PC ae C32:0	glycerophospholipids	Phosphatidylcholines acyl-alkyl C32:0
PC ae C34:0	glycerophospholipids	Phosphatidylcholines acyl-alkyl C34:0
PC ae C36:0	glycerophospholipids	Phosphatidylcholines acyl-alkyl C36:0
PC ae C38:0	glycerophospholipids	Phosphatidylcholines acyl-alkyl C38:0
PC ae C40:0	glycerophospholipids	Phosphatidylcholines acyl-alkyl C40:0
PC ae C32:1	glycerophospholipids	Phosphatidylcholines acyl-alkyl C32:1
PC ae C34:1	glycerophospholipids	Phosphatidylcholines acyl-alkyl C34:1
PC ae C36:1	glycerophospholipids	Phosphatidylcholines acyl-alkyl C36:1
PC ae C38:1	glycerophospholipids	Phosphatidylcholines acyl-alkyl C38:1
PC ae C40:1	glycerophospholipids	Phosphatidylcholines acyl-alkyl C40:1
PC ae C34:2	glycerophospholipids	Phosphatidylcholines acyl-alkyl C34:2
PC ae C36:2	glycerophospholipids	Phosphatidylcholines acyl-alkyl C36:2
PC ae C38:2	glycerophospholipids	Phosphatidylcholines acyl-alkyl C38:2
PC ae C40:2	glycerophospholipids	Phosphatidylcholines acyl-alkyl C40:2
PC ae C34:3	glycerophospholipids	Phosphatidylcholines acyl-alkyl C34:3
PC ae C36:3	glycerophospholipids	Phosphatidylcholines acyl-alkyl C36:3
PC ae C38:3	glycerophospholipids	Phosphatidylcholines acyl-alkyl C38:3
PC ae C40:3	glycerophospholipids	Phosphatidylcholines acyl-alkyl C40:3
PC ae C36:6	glycerophospholipids	Phosphatidylcholines acyl-alkyl C36:4
PC ae C38:4	glycerophospholipids	Phosphatidylcholines acyl-alkyl C38:4
PC ae C40:4	glycerophospholipids	Phosphatidylcholines acyl-alkyl C40:4
PC ae C36:5	glycerophospholipids	Phosphatidylcholines acyl-alkyl C36:5
PC ae C38:5	glycerophospholipids	Phosphatidylcholines acyl-alkyl C38:5
PC ae C40:5	glycerophospholipids	Phosphatidylcholines acyl-alkyl C40:5
PC ae C42:5	glycerophospholipids	Phosphatidylcholines acyl-alkyl C42:5
PC ae C44:5	glycerophospholipids	Phosphatidylcholines acyl-alkyl C44:5
PC ae C34:6	glycerophospholipids	Phosphatidylcholines acyl-alkyl C34:6
PC ae C36:6.1	glycerophospholipids	Phosphatidylcholines acyl-alkyl C36:6
PC ae C38:6	glycerophospholipids	Phosphatidylcholines acyl-alkyl C38:6
PC ae C40:6	glycerophospholipids	Phosphatidylcholines acyl-alkyl C40:6
PC ae C42:6	glycerophospholipids	Phosphatidylcholines acyl-alkyl C42:6
PC ae C32:8	glycerophospholipids	Phosphatidylcholines acyl-alkyl C32:8
PC a C18:1	glycerophospholipids	Phosphatidylcholine acyl C18:1
PE a (OH, COOH) C12:2	glycerophospholipids	Hydroxyl-carboxyphosphatidylethanolamines acyl C12:2
PE a (OH, COOH) C14:3	glycerophospholipids	Hydroxyl-carboxyphosphatidylethanolamines acyl C14:3
PC a C20:4	glycerophospholipids	Phosphatidylcholine acyl C20:4
PC e C30:0	glycerophospholipids	Phosphatidylcholine alkyl C30:0
PE aa C34:2	glycerophospholipids	Phatidylethanolamines diacyl C34:2
PE aa C36:2	glycerophospholipids	Phatidylethanolamines diacyl C36:2
PE aa C36:4	glycerophospholipids	Phatidylethanolamines diacyl C36:4
PE aa C38:4	glycerophospholipids	Phatidylethanolamines diacyl C38:4
PE aa C38:5	glycerophospholipids	Phatidylethanolamines diacyl C38:5
PE aa C38:6	glycerophospholipids	Phatidylethanolamines diacyl C38:6
PE aa C40:6	glycerophospholipids	Phatidylethanolamines diacyl C40:6
PA aa C22:2	glycerophospholipids	Phosphatidic acids diacyl C22:2
PG a C26:6	glycerophospholipids	Phosphatidylglycerols acyl C26:6
PE ae C42:7	glycerophospholipids	Phatidylethanolamines acyl-alkyl C42:7
PE a C10:0	glycerophospholipids	Phatidylethanolamines acyl C10:0
PA aa C42:5	glycerophospholipids	Phosphatidic acids diacyl C42:5
PA aa C20:7	glycerophospholipids	Phosphatidic acids diacyl C20:7
PA a C20:1	glycerophospholipids	Phosphatidic acids acyl C20:1
PI aa (OH, COOH) C28:1	glycerophospholipids	Hydroxyl-carboxyphosphatidylinositols diacyl C28:1
PI aa C34:1	glycerophospholipids	Phosphatidylinositols diacyl C34:1
PI aa C36:1	glycerophospholipids	Phosphatidylinositols diacyl C36:1
PI aa C36:2	glycerophospholipids	Phosphatidylinositols diacyl C36:2
PI aa C36:4	glycerophospholipids	Phosphatidylinositols diacyl C36:4
PI aa C38:4	glycerophospholipids	Phosphatidylinositols diacyl C38:4
